# Supplementary material for: Vertical distribution of polycyclic aromatic hydrocarbons in the brackish sea water column: ex situ experiment
Source: PeerJ. 2020 Oct 27;8:e10087. doi: 10.7717/peerj.10087 (PMC7597627; doi:10.7717/peerj.10087)
Supplement: Supplemental Information 1 [file peerj-08-10087-s001.xlsx]

## Sheet: fig 1
layer	hours	mean	SD	phase
surface	1	51.6667	3.915	suspended
surface	2	44.5233	2.38706	suspended
surface	4	37.45	2.76491	suspended
surface	7	12.4267	1.94878	suspended
surface	72	61.7067	2.33875	suspended
surface	120	44.74	0.88476	suspended
surface	336	51.0067	3.26033	suspended
surface	504	27.8433	3.70163	suspended
surface	984	12.7267	2.56368	suspended
surface	1	172.28	24.1708	dissolved
surface	2	110.407	17.3123	dissolved
surface	4	22.78	4.76816	dissolved
surface	7	51.3667	4.5584	dissolved
surface	72	51.2267	3.06139	dissolved
surface	120	43.8833	3.35962	dissolved
surface	336	53.8467	3.20002	dissolved
surface	504	35.3833	2.09763	dissolved
surface	984	21.73	2.26099	dissolved
bottom	1	50.42	3.87248	suspended
bottom	2	48.88	3.93196	suspended
bottom	4	59.5233	3.5532	suspended
bottom	7	13.2433	0.547205	suspended
bottom	72	19.4433	1.52739	suspended
bottom	120	5.75667	0.56199	suspended
bottom	336	40.14	2.53006	suspended
bottom	504	19.3733	0.776745	suspended
bottom	984	12.5833	0.845833	suspended
bottom	1	69.6567	10.4613	dissolved
bottom	2	194.273	23.1484	dissolved
bottom	4	30.5167	2.93303	dissolved
bottom	7	51.5833	4.60908	dissolved
bottom	72	56.01	1.21528	dissolved
bottom	120	42.7333	1.89769	dissolved
bottom	336	63.93	4.24501	dissolved
bottom	504	40.1867	2.54105	dissolved
bottom	984	36.48	2.40898	dissolved

## Sheet: fig 2
hours	2-3 rings	4-6 rings	phase
1	59.8095	40.1905	dissolved
2	79.619	20.381	dissolved
4	90.0952	9.90476	dissolved
7	80.9524	19.0476	dissolved
72	92	8	dissolved
120	59.619	40.381	dissolved
336	91.8095	8.19048	dissolved
504	93.9048	6.09524	dissolved
984	92.9524	7.04762	dissolved
1	10.0193	89.9807	suspended
2	44.894	55.106	suspended
4	89.9807	10.0193	suspended
7	79.9615	20.0385	suspended
72	89.9807	10.0193	suspended
120	60.1156	39.8844	suspended
336	91.7148	8.28516	suspended
504	95.183	4.81696	suspended
984	93	7	suspended

## Sheet: fig 3
layer	hours	mean	SD	phase
surface	1	23.525	20.3975	suspended	2-3 rings
surface	2	20.6283	19.6088	suspended	2-3 rings
surface	4	8.54833	5.01613	suspended	2-3 rings
surface	7	4.79833	1.08778	suspended	2-3 rings
surface	72	27.085	23.4122	suspended	2-3 rings
surface	120	21.0533	21.296	suspended	2-3 rings
surface	336	28.6233	21.5062	suspended	2-3 rings
surface	504	5.095	0.761781	suspended	2-3 rings
surface	984	4.74667	0.976702	suspended	2-3 rings
surface	1	38.9383	9.92679	dissolved	2-3 rings
surface	2	26.025	9.84629	dissolved	2-3 rings
surface	4	20.0067	3.91681	dissolved	2-3 rings
surface	7	20.2067	19.0766	dissolved	2-3 rings
surface	72	23.2567	12.2887	dissolved	2-3 rings
surface	120	13.6383	12.2738	dissolved	2-3 rings
surface	336	24.6233	14.6177	dissolved	2-3 rings
surface	504	16.635	11.2209	dissolved	2-3 rings
surface	984	20.0133	2.0543	dissolved	2-3 rings
bottom	1	23.275	21.7803	suspended	2-3 rings
bottom	2	22.4233	21.8147	suspended	2-3 rings
bottom	4	26.0233	24.2749	suspended	2-3 rings
bottom	7	3.45833	0.353916	suspended	2-3 rings
bottom	72	8.56167	5.67665	suspended	2-3 rings
bottom	120	2.87833	1.65509	suspended	2-3 rings
bottom	336	6.65333	1.22142	suspended	2-3 rings
bottom	504	5.75833	0.651196	suspended	2-3 rings
bottom	984	4.17833	0.894995	suspended	2-3 rings
bottom	1	29.0367	4.41467	dissolved	2-3 rings
bottom	2	34.6067	5.84448	dissolved	2-3 rings
bottom	4	28.22	2.55525	dissolved	2-3 rings
bottom	7	20.395	18.8779	dissolved	2-3 rings
bottom	72	25.265	16.0894	dissolved	2-3 rings
bottom	120	40.0833	1.55597	dissolved	2-3 rings
bottom	336	20.03	8.08581	dissolved	2-3 rings
bottom	504	15.8417	10.0249	dissolved	2-3 rings
bottom	984	14.8683	14.7187	dissolved	2-3 rings
surface	1	4.61667	2.04456	suspended	4-6 ring
surface	2	3.26667	0.572917	suspended	4-6 ring
surface	4	20.36	0.741013	suspended	4-6 ring
surface	7	2.82333	0.92029	suspended	4-6 ring
surface	72	7.53667	0.846542	suspended	4-6 ring
surface	120	2.64	0.200749	suspended	4-6 ring
surface	336	25.0767	1.04309	suspended	4-6 ring
surface	504	17.6567	2.14019	suspended	4-6 ring
surface	984	3.23333	0.933881	suspended	4-6 ring
surface	1	31.4689	18.0071	dissolved	4-6 ring
surface	2	29.09	24.3595	dissolved	4-6 ring
surface	4	2.77	0.858603	dissolved	4-6 ring
surface	7	10.9567	2.1133	dissolved	4-6 ring
surface	72	4.71333	0.6278	dissolved	4-6 ring
surface	120	16.61	1.13062	dissolved	4-6 ring
surface	336	4.59333	0.258134	dissolved	4-6 ring
surface	504	2.11333	0.535755	dissolved	4-6 ring
surface	984	1.71667	0.237557	dissolved	4-6 ring
bottom	1	3.87333	0.9942	suspended	4-6 ring
bottom	2	4.04	0.441362	suspended	4-6 ring
bottom	4	7.48	1.02235	suspended	4-6 ring
bottom	7	6.33	0.244336	suspended	4-6 ring
bottom	72	2.32333	0.246847	suspended	4-6 ring
bottom	120			suspended	4-6 ring
bottom	336	26.8333	1.2562	suspended	4-6 ring
bottom	504	7.85333	0.456545	suspended	4-6 ring
bottom	984	4.22667	0.330807	suspended	4-6 ring
bottom	1	11.5967	4.16415	dissolved	4-6 ring
bottom	2	61.8633	13.3605	dissolved	4-6 ring
bottom	4	2.29667	0.378594	dissolved	4-6 ring
bottom	7	10.79	1.51159	dissolved	4-6 ring
bottom	72	5.48333	0.0971253	dissolved	4-6 ring
bottom	120	2.65	0.374032	dissolved	4-6 ring
bottom	336	23.87	1.15308	dissolved	4-6 ring
bottom	504	8.50333	1.32429	dissolved	4-6 ring
bottom	984	6.74667	0.698665	dissolved	4-6 ring

## Sheet: fig 4
hours	mean	SD	PAHs compounds	phase
1	53.3481	3.05987	naphtalene	dissolved	2-3 rings
2	40.1774	1.72949	naphtalene	dissolved	2-3 rings
4			naphtalene	dissolved	2-3 rings
7	2.66075	0.665188	naphtalene	dissolved	2-3 rings
72	11.5743	2.66075	naphtalene	dissolved	2-3 rings
120	2.39468	1.19734	naphtalene	dissolved	2-3 rings
336	11.5743	2.26164	naphtalene	dissolved	2-3 rings
504	6.25277	2.26164	naphtalene	dissolved	2-3 rings
1	25.0111	4.25721	anthracene	dissolved	2-3 rings
2	30.0665	4.25721	anthracene	dissolved	2-3 rings
4	12.6386	0.532151	anthracene	dissolved	2-3 rings
7	29.9335	2.1286	anthracene	dissolved	2-3 rings
72	30.3326	1.59645	anthracene	dissolved	2-3 rings
120			anthracene	dissolved	2-3 rings
336	34.0576	2.79379	anthracene	dissolved	2-3 rings
504	24.612	1.33038	anthracene	dissolved	2-3 rings
984	18.2262	0.266075	anthracene	dissolved	2-3 rings
1	42.439	1.72949	phenanthrene	dissolved	2-3 rings
2	15.1663	3.1929	phenanthrene	dissolved	2-3 rings
4	7.45011	2.39468	phenanthrene	dissolved	2-3 rings
7	7.58315	1.33038	phenanthrene	dissolved	2-3 rings
72	4.52328	0.665188	phenanthrene	dissolved	2-3 rings
120	5.32151	0.665188	phenanthrene	dissolved	2-3 rings
336	3.72506	1.0643	phenanthrene	dissolved	2-3 rings
504	2.1286	0.532151	phenanthrene	dissolved	2-3 rings
984	1.59645	2.26164	phenanthrene	dissolved	2-3 rings
1	43.4328	3.20896	naphtalene	suspended	2-3 rings
2	38.9552	2.68657	naphtalene	suspended	2-3 rings
4	12.9851	1.64179	naphtalene	suspended	2-3 rings
7	3.8806	0.373134	naphtalene	suspended	2-3 rings
72	48.2836	3.35821	naphtalene	suspended	2-3 rings
120	40.9701	2.61194	naphtalene	suspended	2-3 rings
336	14.6269	2.46269	naphtalene	suspended	2-3 rings
504	4.77612	0.746269	naphtalene	suspended	2-3 rings
984	4.02985	0.522388	naphtalene	suspended	2-3 rings
1	2.61194	0.298507	phenanthrene	suspended	2-3 rings
2	1.41791	0.522388	phenanthrene	suspended	2-3 rings
4	2.68657	0.746269	phenanthrene	suspended	2-3 rings
7	3.20896	0.223881	phenanthrene	suspended	2-3 rings
72	2.38806	0.373134	phenanthrene	suspended	2-3 rings
120	1.41791	0.522388	phenanthrene	suspended	2-3 rings
336	1.56716	0.373134	phenanthrene	suspended	2-3 rings
504	3.8806	0.597015	phenanthrene	suspended	2-3 rings
984	1.41791	0.223881	phenanthrene	suspended	2-3 rings
1	1.41791	0.0746269	anthracene	suspended	2-3 rings
2	1.34328	0.149254	anthracene	suspended	2-3 rings
4	1.41791	0.223881	anthracene	suspended	2-3 rings
7	2.61194	0.298507	anthracene	suspended	2-3 rings
72	3.28358	0.597015	anthracene	suspended	2-3 rings
120			anthracene	suspended	2-3 rings
336	9.47761	0.820896	anthracene	suspended	2-3 rings
504	1.56716	0.223881	anthracene	suspended	2-3 rings
984	3.8806	0.447761	anthracene	suspended	2-3 rings
1	23.4444	1.82457	pyrene	dissolved	4-6 rings
2	4.33333	3.18058	Pyr	dissolved	4-6 rings
4	2.5	2.39796	Pyr	dissolved	4-6 rings
7	4.77778	1.28901	Pyr	dissolved	4-6 rings
72	4.5	0.620594	Pyr	dissolved	4-6 rings
120	3.5	0.618738	Pyr	dissolved	4-6 rings
336	4.44444	1.06576	Pyr	dissolved	4-6 rings
504	2	0.44898	Pyr	dissolved	4-6 rings
984	1.55556	2.28489	Pyr	dissolved	4-6 rings
1	13.5556	3.19769	fluoranthene	dissolved	4-6 rings
2			flt	dissolved	4-6 rings
4	12.6111	1.30355	flt	dissolved	4-6 rings
7	3.83333	0.563698	flt	dissolved	4-6 rings
72	19.2222	1.20449	flt	dissolved	4-6 rings
1	18.1667	4.2081	chrysene	dissolved	4-6 rings
2	12.7222	4.198	chr	dissolved	4-6 rings
4			chr	dissolved	4-6 rings
7	2.55556	2.06411	chr	dissolved	4-6 rings
1	18.1111	2.48258	benzo(k)fluoranthene	dissolved	4-6 rings
2	7.83333	1.2383	bkf	dissolved	4-6 rings
1	7.44444		benzo(a)pyrene	dissolved	4-6 rings
1	6.5	3.51855	indeno(1.2.3-c,d)pyrene	dissolved	4-6 rings
1	17.5	4.20686	benzo(ghi)perylene	dissolved	4-6 rings
1	4.08805	0.188679	Pyr	suspended	4-6 rings
2	3.01887	0.377358	Pyr	suspended	4-6 rings
4	6.47799	0.628931	Pyr	suspended	4-6 rings
7	1.50943	0.188679	Pyr	suspended	4-6 rings
72	5.28302	1.06918	Pyr	suspended	4-6 rings
120	2.51572	0.566038	Pyr	suspended	4-6 rings
504	4.59119	0.566038	Pyr	suspended	4-6 rings
1			flt	suspended	4-6 rings
2			flt	suspended	4-6 rings
4	1.38365	1.63522	flt	suspended	4-6 rings
7	1.32075	0.440252	flt	suspended	4-6 rings
72			flt	suspended	4-6 rings
120			flt	suspended	4-6 rings
336			flt	suspended	4-6 rings
504	1.50943	0.754717	flt	suspended	4-6 rings
1			benzo(a)anthracene	suspended	4-6 rings
2			baa	suspended	4-6 rings
4	10.9434	1.32075	baa	suspended	4-6 rings
7			baa	suspended	4-6 rings
72	2.64151	1.00629	baa	suspended	4-6 rings
336	25.283	1.00629	baa	suspended	4-6 rings
504	11.5723	0.377358	baa	suspended	4-6 rings
984	3.52201	1.00629	baa	suspended	4-6 rings
1			chr	suspended	4-6 rings
2			chr	suspended	4-6 rings
4	2.64151	0.188679	chr	suspended	4-6 rings

## Sheet: fig 5
hours	surface	bottom	PAHs compounds
1	-1.20578	-0.610419	log(Kp Phenantrene)
2	-1.01119	-1.03884	log(Kp Phenantrene)
4	-0.40119	-0.138111	log(Kp Phenantrene)
7	-0.379621	-0.400406	log(Kp Phenantrene)
72	-0.268099	-0.275006	log(Kp Phenantrene)
120	-0.558104	-0.599643	log(Kp Phenantrene)
336	-0.370395	-0.107332	log(Kp Phenantrene)
504	0.281147	0.0526837	log(Kp Phenantrene)
984	-0.548846	-0.168089	log(Kp Phenantrene)
1	-0.735919	-0.212856	log(Kp Pyrene)
2	-0.150373	-0.0965629	log(Kp Pyrene)
4	0.0504812	0.873529	log(Kp Pyrene)
7	-0.479422	0.874418	log(Kp Pyrene)
72	0.0830106	0.352244	log(Kp Pyrene)
120	-0.108428	-0.108482	log(Kp Pyrene)
336	0.36937	-0.37679	log(Kp Pyrene)
504	-0.491305	-0.498998	log(Kp Pyrene)
984	0.0326835	0.0403578	log(Kp Pyrene)

## Sheet: fig 6
log(Kp)	suspended matter mg/L -1	PAHs compounds
0.368	0.0401	Pyrene
-0.1403	0.0521	Pyrene
0.0263	0.0641	Pyrene
0.0701	0.066	Pyrene
-0.1667	0.064	Pyrene
-0.5088	0.0708	Pyrene
-0.7544	0.082	Pyrene
0.2761	0.0501	phenanthrene
-0.3648	0.0401	phenanthrene
-0.5521	0.046	phenanthrene
-0.562	0.0521	phenanthrene
-0.2761	0.066	phenanthrene
-0.4239	0.0641	phenanthrene
-0.3746	0.0701	phenanthrene
-1.0056	0.0655	phenanthrene
-1.193	0.0819	phenanthrene
